# Supplementary material for: Localization of the bioadhesive precursors of the sandcastle worm, Phragmatopoma californica (Fewkes)
Source: Oxford University Press journal article supplement (doi:10.1242/jeb.065011), 2011-12-21
Supplement: jeb065011tables1.pdf [file jeb065011tables1.pdf]

Table S1. Primer sets for real-time PCR

| Gene         | Primers (5'–3')                                                       |
|--------------|-----------------------------------------------------------------------|
| Actin        | Forward: GCTGTCTTCCCATCCATTGT<br>Reverse: GTTAAGTGGGGCCTCTGTGA        |
| Pc1          | Forward: TTTGGTCTCTGCTGCATACG<br>Reverse: TAATTTACCTGCGCCGAGTC        |
| Pc2          | Forward: CAGTAGCAGTCAAAGCTGCT<br>Reverse: ATAGCCACCAGCAGCCTTG         |
| Pc3A         | Forward: CCAGTAGCATTTTAAGTACCAG<br>Reverse: CTAGAATACTCTCTTGAGACATC   |
| Pc3B         | Forward: ATGAAATGCTTCACTATTTTTGCC<br>Reverse: AGAACTGTATCTCTTGCAACATC |
| Pc4          | Forward: CATCCGGAGGTACTCACAG<br>Reverse: GCCAACCCAGCTGCATGAAG         |
| Pc5          | Forward: GTA CTCTCGCCCTTGTTG<br>Reverse: GCAGGAGCATGGAATACAGG         |
| Pc19         | Forward: GTAGCATCAACGGAGGTGGT<br>Reverse: ATGCGCCTGATCTATCCA AA       |
| Pc26         | Forward: TGATCTTCGTGCTGGACTTG<br>Reverse: CGTGATGAAGATCGCTGCTA        |
| Collagen     | Forward: CCTGGTAACGCTGGAAACAT<br>Reverse: TTCACCCCTTCCTCCTTTCT        |
| Tyrosinase 2 | Forward: GCACATAAGGGACCAGCATT<br>Reverse: TGTCTCCGTAGAACGCACAG        |
| Pero6        | Forward: CAAATTAGCAGGGGAGTTCCG<br>Reverse: GGGCATCTTTTTCATCTGGA       |
| Lac2         | Forward: GATCTGCATGGGTCCAGTTT<br>Reverse: ACGTTTTGTCCCTTCCACAG        |
| Tyrosinase 1 | Forward: TCGAGGTAGAGGCAATGGTC<br>Reverse: CATGACCACCGTGAGCATA C       |
| Peroxidasin  | Forward: GCAGATTTGCAACCCAATTT<br>Reverse: CGTCTTCATATTGGGCAGGT        |
