# Supplementary material for: Localization of the bioadhesive precursors of the sandcastle worm, Phragmatopoma californica (Fewkes)
Source: Oxford University Press journal article supplement (doi:10.1242/jeb.065011), 2011-12-21
Supplement: jeb065011tables2.pdf [file jeb065011tables2.pdf]

Table S2. Primer sets for *in situ* hybridization

| Gene                    |         | Sequence (5'–3')                                     |
|-------------------------|---------|------------------------------------------------------|
| Pc1                     | Forward | ATGATTTTATTTTGACTGATAGTGACCTGTTGTTGCAACAA            |
|                         | Reverse | <u>TAATACGACTCACTATAGG</u> TTAATACCCATATCCGCCCA      |
| Pc2                     | Forward | ATGAAAGTACTCATT TTTCTCGCTACAGTAGCTGCTG               |
|                         | Reverse | <u>TAATACGACTCACTATAGG</u> TTAATAGCCATAGCCACC        |
| Pc3A                    | Forward | TTTTAAGTACCAGTACTTCAAGTTCAGACTGGAAAAGG               |
|                         | Reverse | <u>TAATACGACTCACTATAGG</u> TAGAATACTCTCTTGAGACATCTTC |
| Pc4                     | Forward | ATGAAGCTTGTGATCTTAGCAATCATCGTGACCGTA                 |
|                         | Reverse | <u>TAATACGACTCACTATAGG</u> CTCCATAACATGCGG           |
| Pc5                     | Forward | ATGAAGTTTCTAGTACTCCTCGCCCTTGT                        |
|                         | Reverse | <u>TAATACGACTCACTATAGG</u> CTACCTTCTTTTCCAG          |
| Control<br>(Pc3A sense) | Forward | <u>TAATACGACTCACTATAGG</u> ATGAAATGCTTCACTATTTTTG    |
|                         | Reverse | CAGCAGCTCTAGCAGCAGTTACAG                             |

Underline: T7 promoter sequence.
