# Supplementary material for: Localization of the bioadhesive precursors of the sandcastle worm, Phragmatopoma californica (Fewkes)
Source: Oxford University Press journal article supplement (doi:10.1242/jeb.065011), 2011-12-21
Supplement: jeb065011tables3.pdf [file jeb065011tables3.pdf]

Table S3. Results of quantitative real-time PCR

| Gene            | Average $C_t$ ( $N=3$ ) | Fold changes relative to actin |
|-----------------|-------------------------|--------------------------------|
| Pc1             | 19.97                   | $9.79e-1 \pm 1.44e-1$          |
| Pc2             | 23.42                   | $8.94e-2 \pm 1.59e-1$          |
| Pc3A            | 21.56                   | $3.25e-1 \pm 4.92e-2$          |
| Pc3B            | 23.48                   | $8.57e-2 \pm 3.15e-2$          |
| Pc4             | 21.87                   | $2.62e-1 \pm 3.59e-2$          |
| Pc5             | 23.95                   | $6.19e-2 \pm 1.20e-2$          |
| Pc9             | 31.00                   | $4.67e-4 \pm 7.13e-5$          |
| Pc19            | 30.15                   | $8.41e-4 \pm 2.69e-6$          |
| Pc26            | 29.39                   | $1.42e-3 \pm 1.04e-4$          |
| Collagen        | 26.19                   | $1.30e-2 \pm 2.39e-3$          |
| Tyrosinase 1    | 23.03                   | $1.17e-1 \pm 2.58e-2$          |
| Tyrosinase 2    | 30.88                   | $5.08e-4 \pm 8.84e-5$          |
| Peroxidasin     | 26.33                   | $1.20e-2 \pm 7.24e-4$          |
| Peroxiredoxin 6 | 27.73                   | $4.50e-3 \pm 9.85e-4$          |
| Laccase 2       | 30.70                   | $5.76e-4 \pm 1.00e-5$          |
| Actin           | 19.94                   | –                              |

Fold increase of genes are normalized to actin which has highest expression in the adhesive gland (fold changes=1).
