# Supplementary material for: Localization of the bioadhesive precursors of the sandcastle worm, Phragmatopoma californica (Fewkes)
Source: Oxford University Press journal article supplement (doi:10.1242/jeb.065011), 2011-12-21
Supplement: jeb065011tables4.pdf [file jeb065011tables4.pdf]

Table S4. Standard curve of quantitative real-time PCR of primer sets

| Gene         | Averaged $C_t$ values at different dilution factors |           |           | $R^2$   | Slope    | Intercept |
|--------------|-----------------------------------------------------|-----------|-----------|---------|----------|-----------|
|              | 1                                                   | $10^{-2}$ | $10^{-4}$ |         |          |           |
| Pc1          | 11.26                                               | 17.92     | 24.83     | 0.99927 | -3.39314 | 11.21501  |
| Pc2          | 13.03                                               | 20.10     | 27.63     | 0.99506 | -3.65265 | 12.95147  |
| Pc3A         | 13.82                                               | 20.53     | 27.52     | 0.99971 | -3.42367 | 13.77607  |
| Pc3B         | 14.07                                               | 22.38     | 29.96     | 0.99910 | -3.97729 | 14.16618  |
| Pc4          | 13.68                                               | 20.04     | 27.41     | 0.99659 | -3.43345 | 13.51070  |
| Pc5          | 15.38                                               | 21.22     | 27.67     | 0.99598 | -3.07335 | 15.27992  |
| Tyrosinase 1 | 19.43                                               | 23.86     | 28.47     | 0.98143 | -2.25948 | 19.40363  |
| Actin        | 11.25                                               | 19.18     | 26.26     | 0.99941 | -3.50297 | 18.22341  |
